# Supplementary material for: A reversible model for periportal fibrosis and a refined alternative to bile duct ligation
Source: Royal Society of Chemistry journal article supplement (doi:10.1039/c3tx50069a), 2013-08-28
Supplement: c3tx50069a.pdf [file c3tx50069a.pdf]

**Supplementary Data**

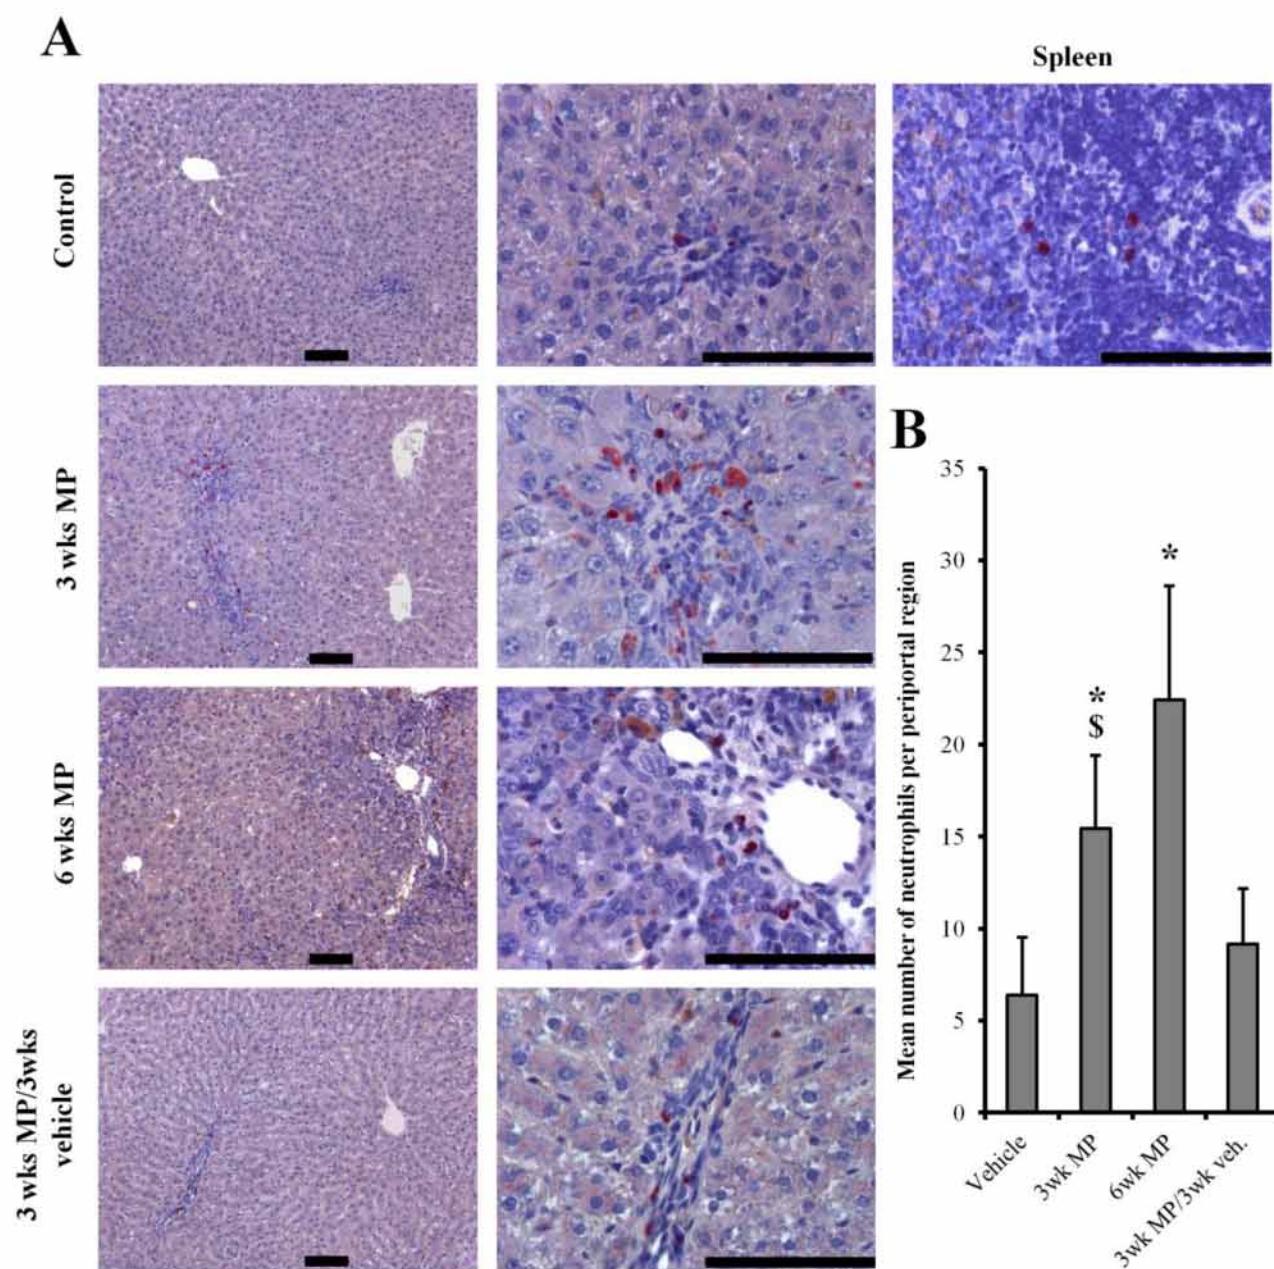

**Supplementary Figure 1: Chronic MP liver injury is associated with neutrophil recruitment to the periportal regions of the liver lobule. A.** Rat liver sections stained for esterase. Images are representative of groups and scale bar indicates 100 $\mu$ m. **B.** Quantified esterase staining of periportal regions. Bars are the mean and SD. \*significant difference compared to the respective control group and  $^{\$}$ significant different compared to the 3 week MP/3 week vehicle group (all  $p < 0.05$ ). Animal numbers - for control,  $n = 3$ ; for 3wk MP, 3wk MP/3 wk vehicle,  $n = 5$ ; and for 6wk MP,  $n = 6$ .

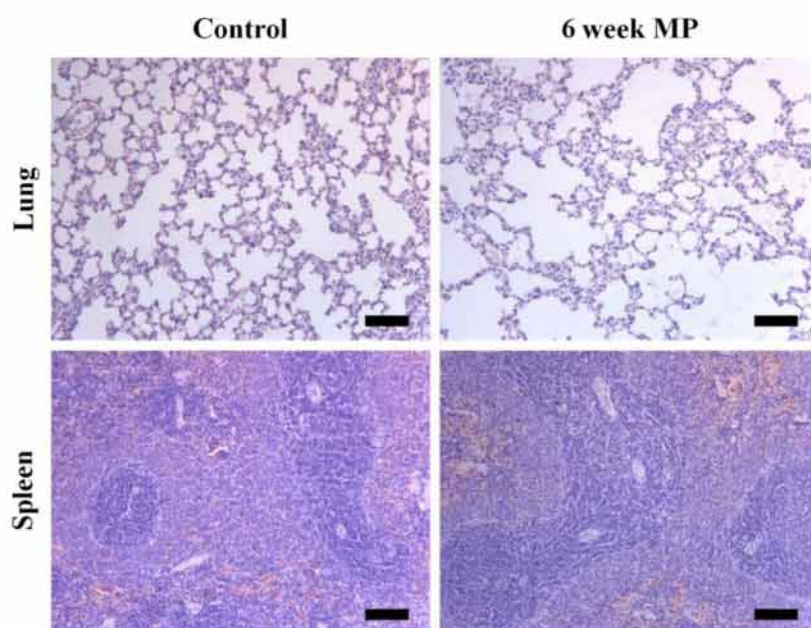

**Supplementary Figure 2: Chronic MP treatment did not alter spleen or lung pathology. A.** H&E stained sections of rat lung or spleen tissue in control or 6 week MP treated rats. Images are representative of groups and scale bar indicates 100 $\mu$ m.

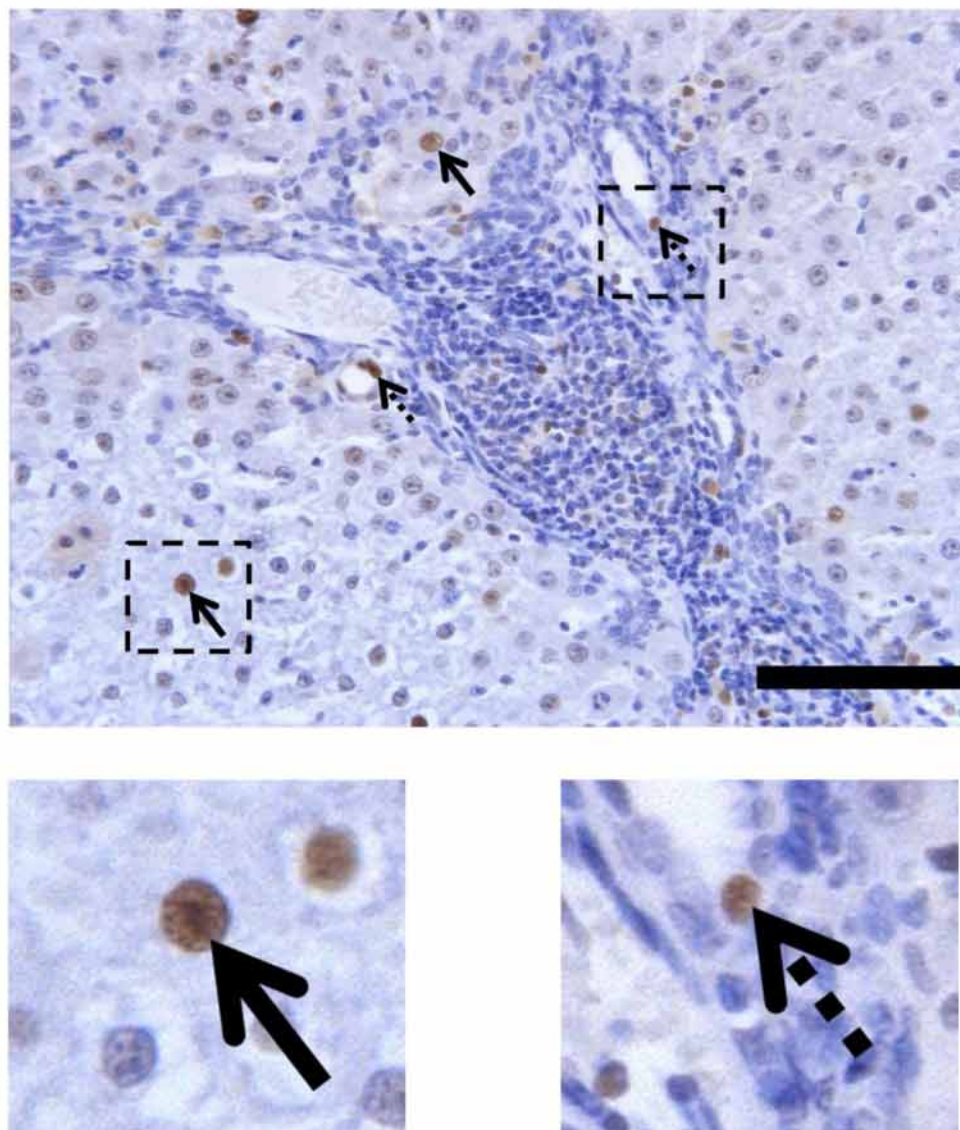

**Supplementary Figure 3: PCNA immunostain in a MP-treated rat liver section.** High magnification of liver periportal region immunostained for PCNA indicating typical PCNA positive hepatocytes (full arrows) and typical positive cholangiocytes (dotted arrows).

---

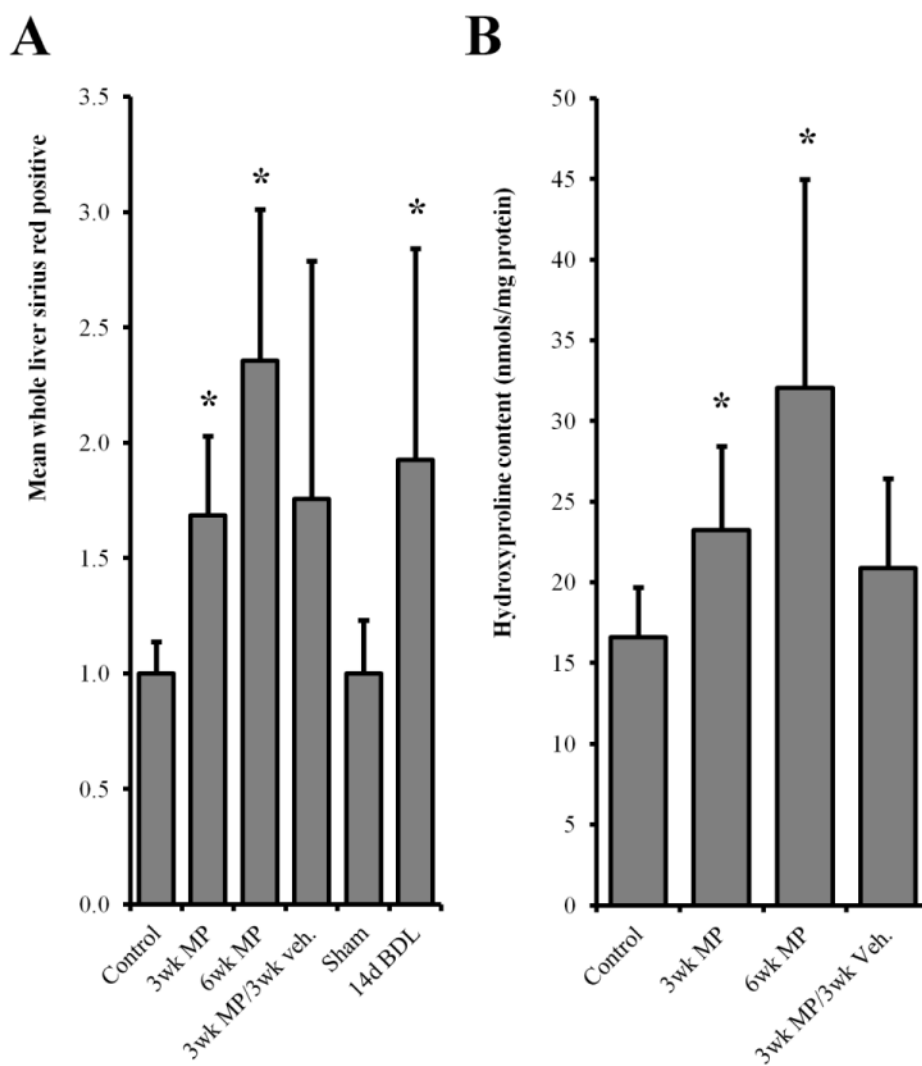

**Supplementary Figure 4: Chronic MP and BDL caused significant hepatic fibrosis.** **A.** Quantification of sirius red staining. **B.** Liver hydroxyproline content following the indicated treatments. Data are expressed relative to respective controls and are the mean + SD. \*Significant difference compared to the control group. Animal numbers - for control, n=3; for 3wk MP and 3wk MP/3 wk vehicle, n=5; 6wk MP, n=6; sham, n=8 and BDL, n= 12.

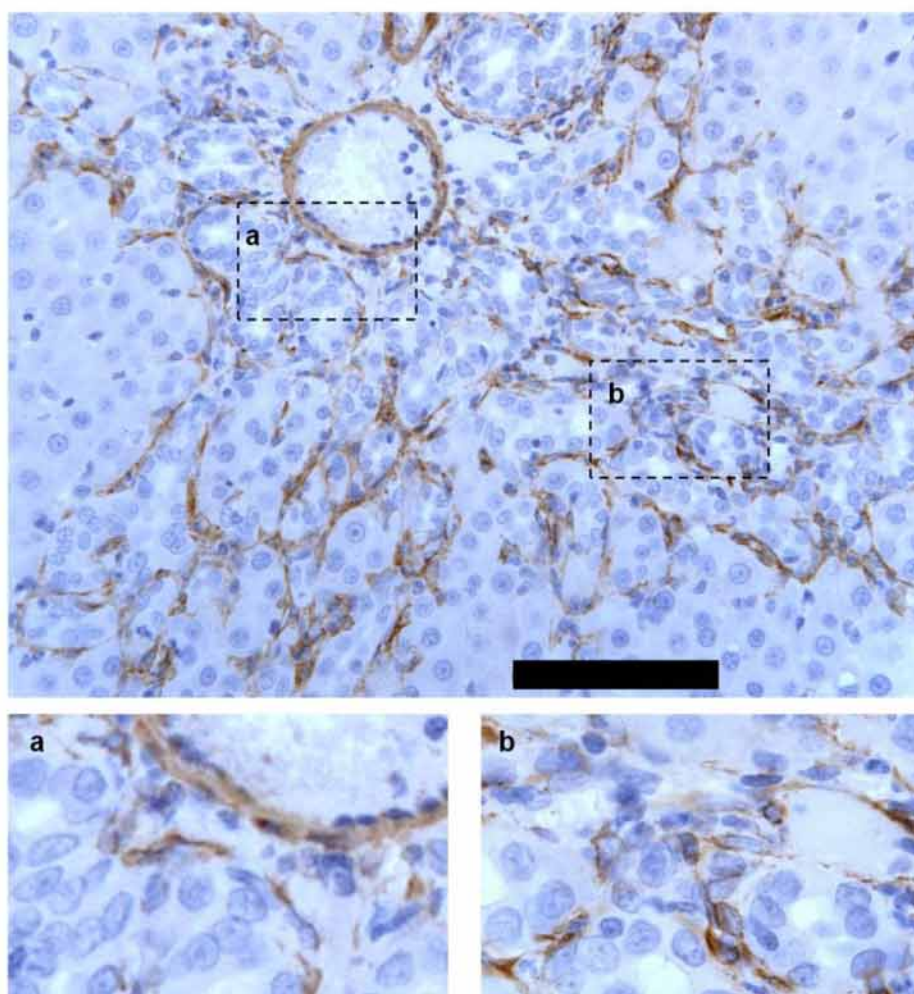

**Supplementary Figure 5:  $\alpha$ -SMA immunostain in a MP-treated rat liver section.** High magnification of liver periportal region immunostained for  $\alpha$ -SMA illustrating cytoplasmic staining myofibroblast cells. a, vessel region, also showing several bile ducts negative for  $\alpha$ -SMA; b parenchymal region.

---
